# Supplementary material
Source: PubMed Central journal article supplement (PMC3250208)

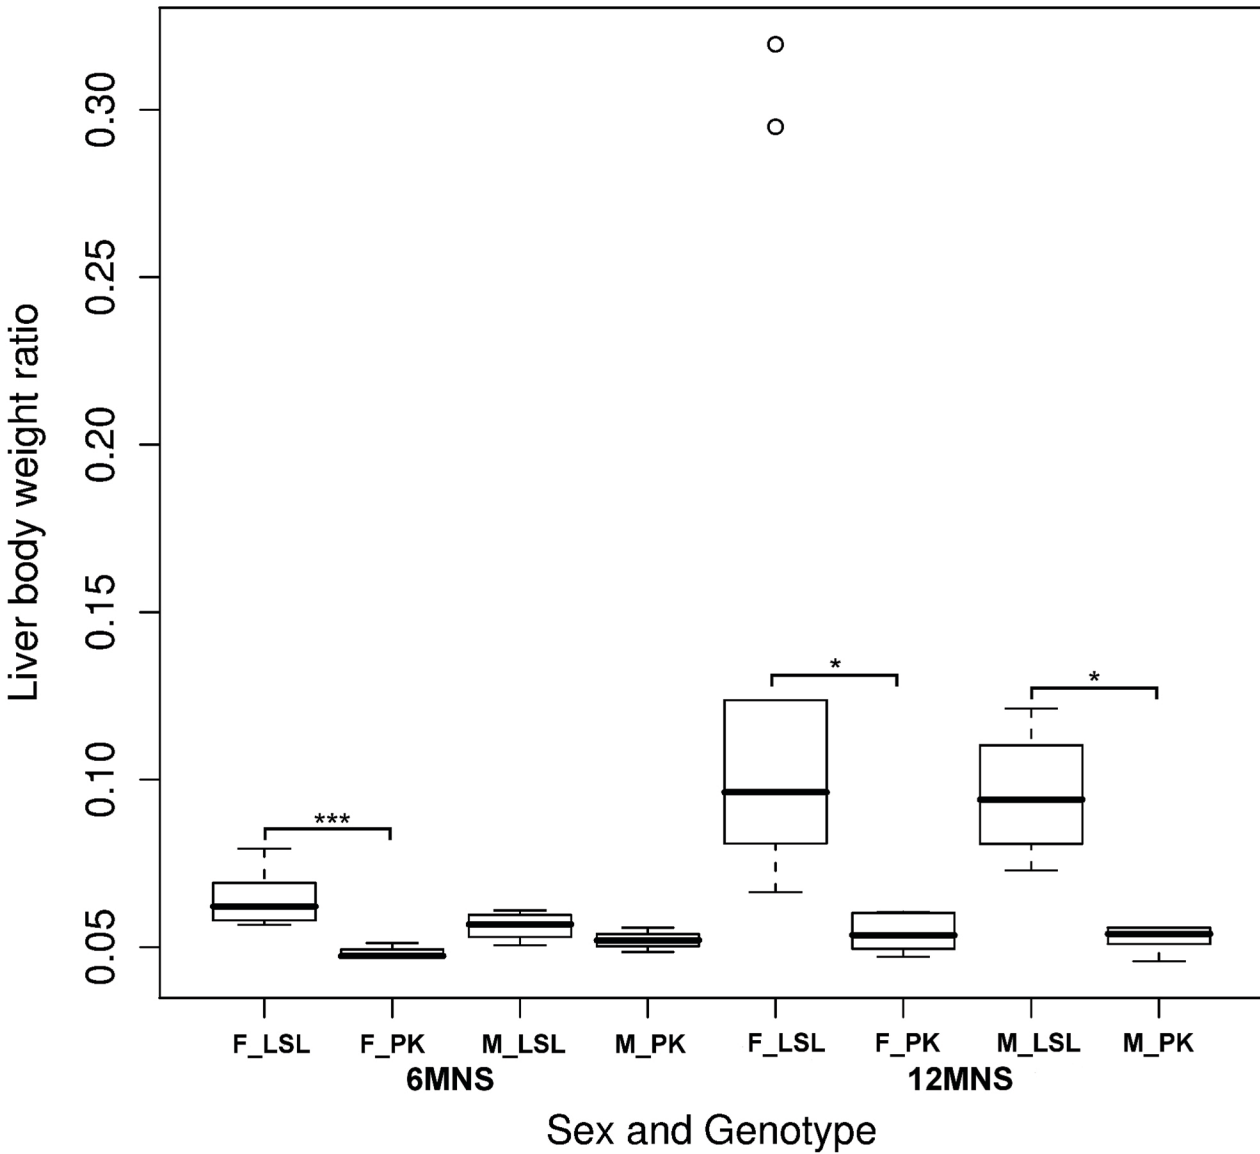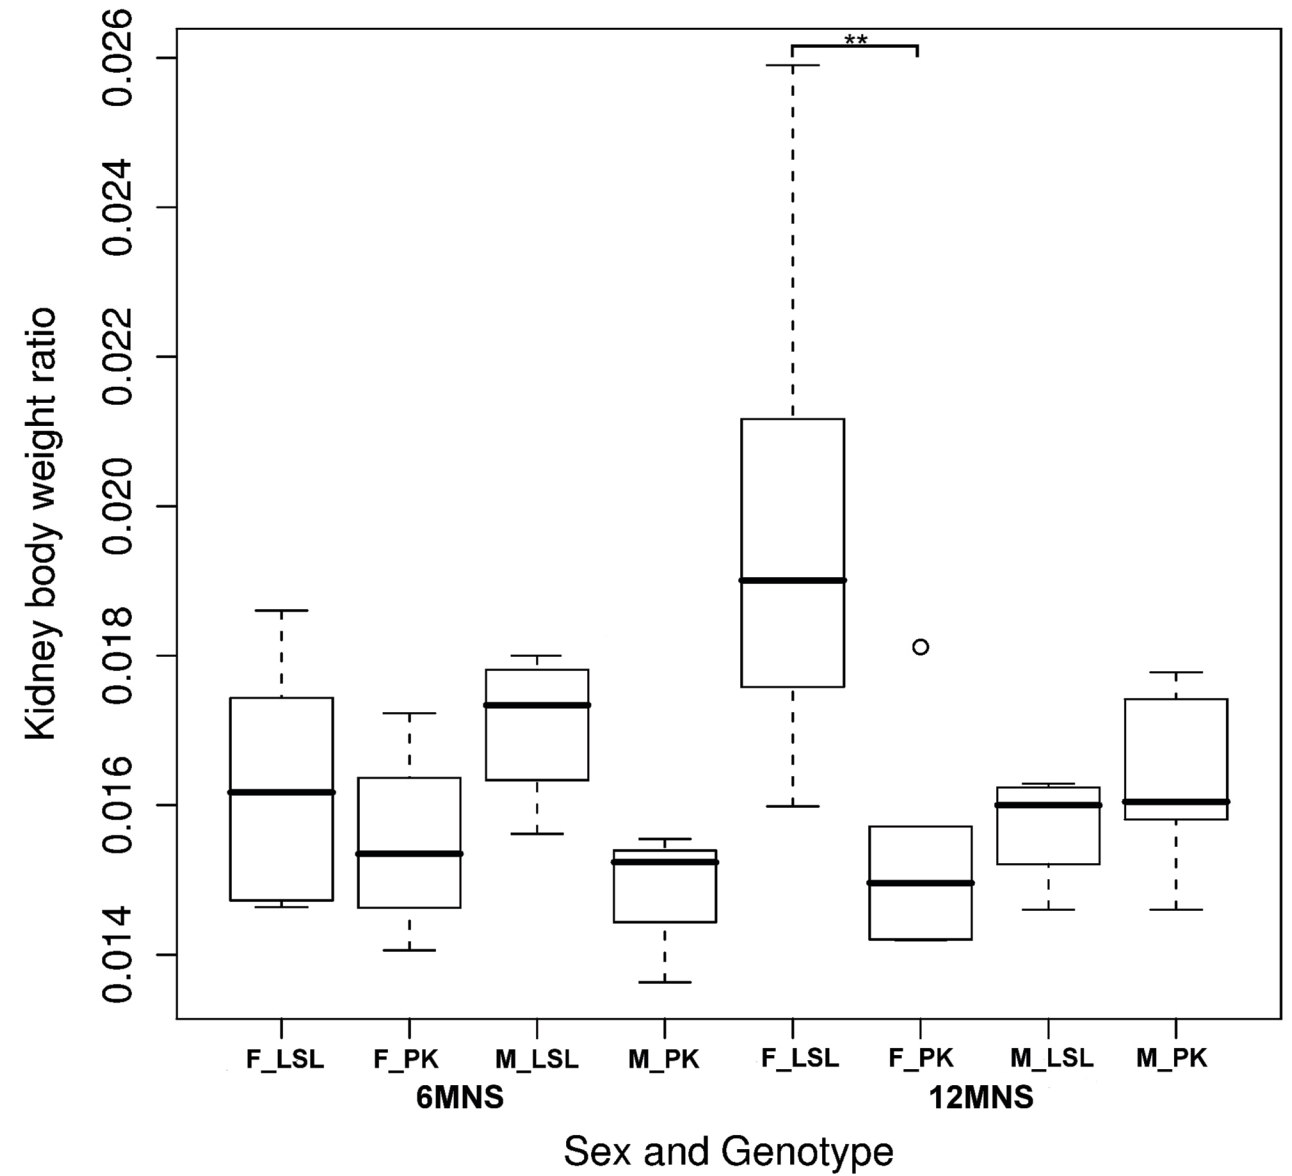

Relative expression of *Pkhd1* vs genotype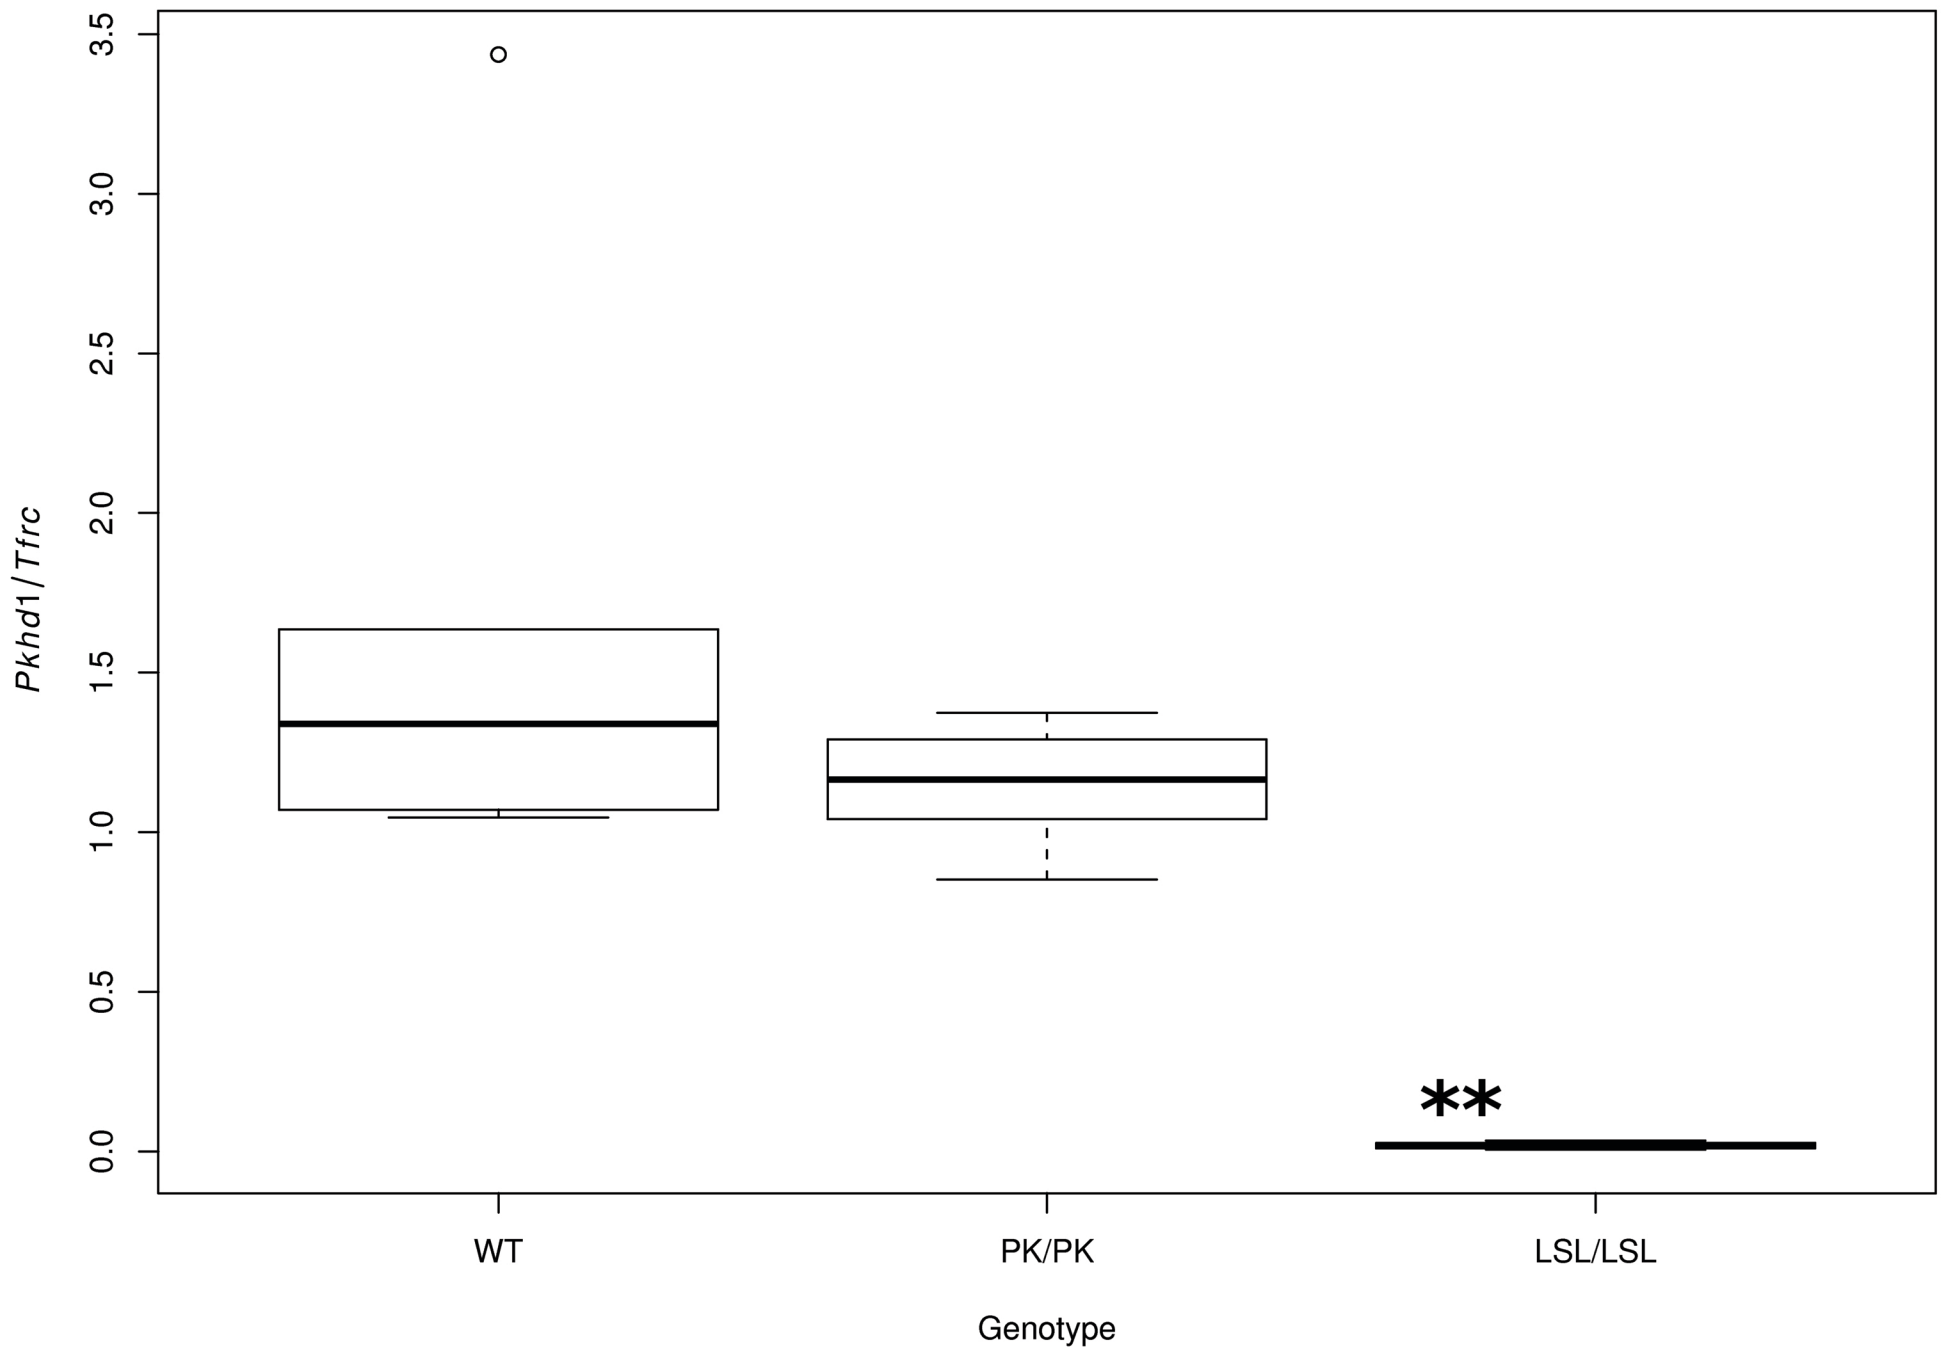

Supplement: supp_ASN.2010111173_Suppok.pdf [file supp_ASN.2010111173_Suppok.pdf]
